# Supplementary material
Source: PubMed Central journal article supplement (PMC4276416)
Supplement: NIHMS649939-supplement-01.pdf [file NIHMS649939-supplement-01.pdf]

**ONLINE SUPPLEMENT.****Table A.** Hospital PCI Appropriateness for Non-Acute Indications by Hospital Quartile of Asymptomatic Patients at Angiography among Hospitals Reporting at Twice as Many Elective Angiography than Elective PCI

| Hospital Characteristics                   | All Hospitals<br>(n=375) | Hospital Quartile of Asymptomatic Patients |                   |                   |                       | P value |
|--------------------------------------------|--------------------------|--------------------------------------------|-------------------|-------------------|-----------------------|---------|
|                                            |                          | 1 – Lowest<br>(n=93)                       | 2<br>(n=94)       | 3<br>(n=94)       | 4 – Highest<br>(n=94) |         |
| Median proportion of asymptomatic, % (IQR) | 25.1 (16.2, 36.2)        | 12.4 (9.1, 13.7)                           | 20.6 (18.1, 22.3) | 30.7 (27.7, 33.4) | 43.0 (39.1, 50.0)     |         |
| Range of asymptomatic, %                   | 1.6-73.6                 | 1.6-16.0                                   | 16.2-25.1         | 25.1-36.0         | 36.2-73.6             |         |
| PCI Appropriateness, median (IQR) %        |                          |                                            |                   |                   |                       |         |
| Inappropriate                              | 22.7 (16.8, 30.5)        | 15.2 (10.0, 21.1)                          | 21.2 (17.0, 27.1) | 24.8 (19.8, 29.9) | 29.8 (22.7, 35.7)     | <.001   |
| Uncertain                                  | 41.4 (34.5, 48.5)        | 45.4 (35.3, 52.8)                          | 45.5 (38.5, 50.7) | 40.2 (34.3, 47.0) | 37.6 (32.6, 43.7)     | <.001   |
| Appropriate                                | 33.1 (23.9, 42.1)        | 38.4 (25.8, 50.7)                          | 31.4 (23.5, 41.2) | 31.9 (25.0, 40.1) | 32.9 (22.6, 39.2)     | <.01    |

Abbreviations: IQR, interquartile range
